# Supplementary material
Source: publisher figshare collection journal article supplement (https://springernature.figshare.com/ndownloader/files/18610778)
Supplement: Supplementary file 1 [file 18610778]

**SUPPORTING INFORMATION**

**Movement behavior of the monito del monte (*Dromiciops gliroides*): new insights into the ecology of a unique marsupial**

Lida M. Franco, Francisco E. Fontúrbel, Giovany Guevara and Mauricio Soto-Gamboa

**
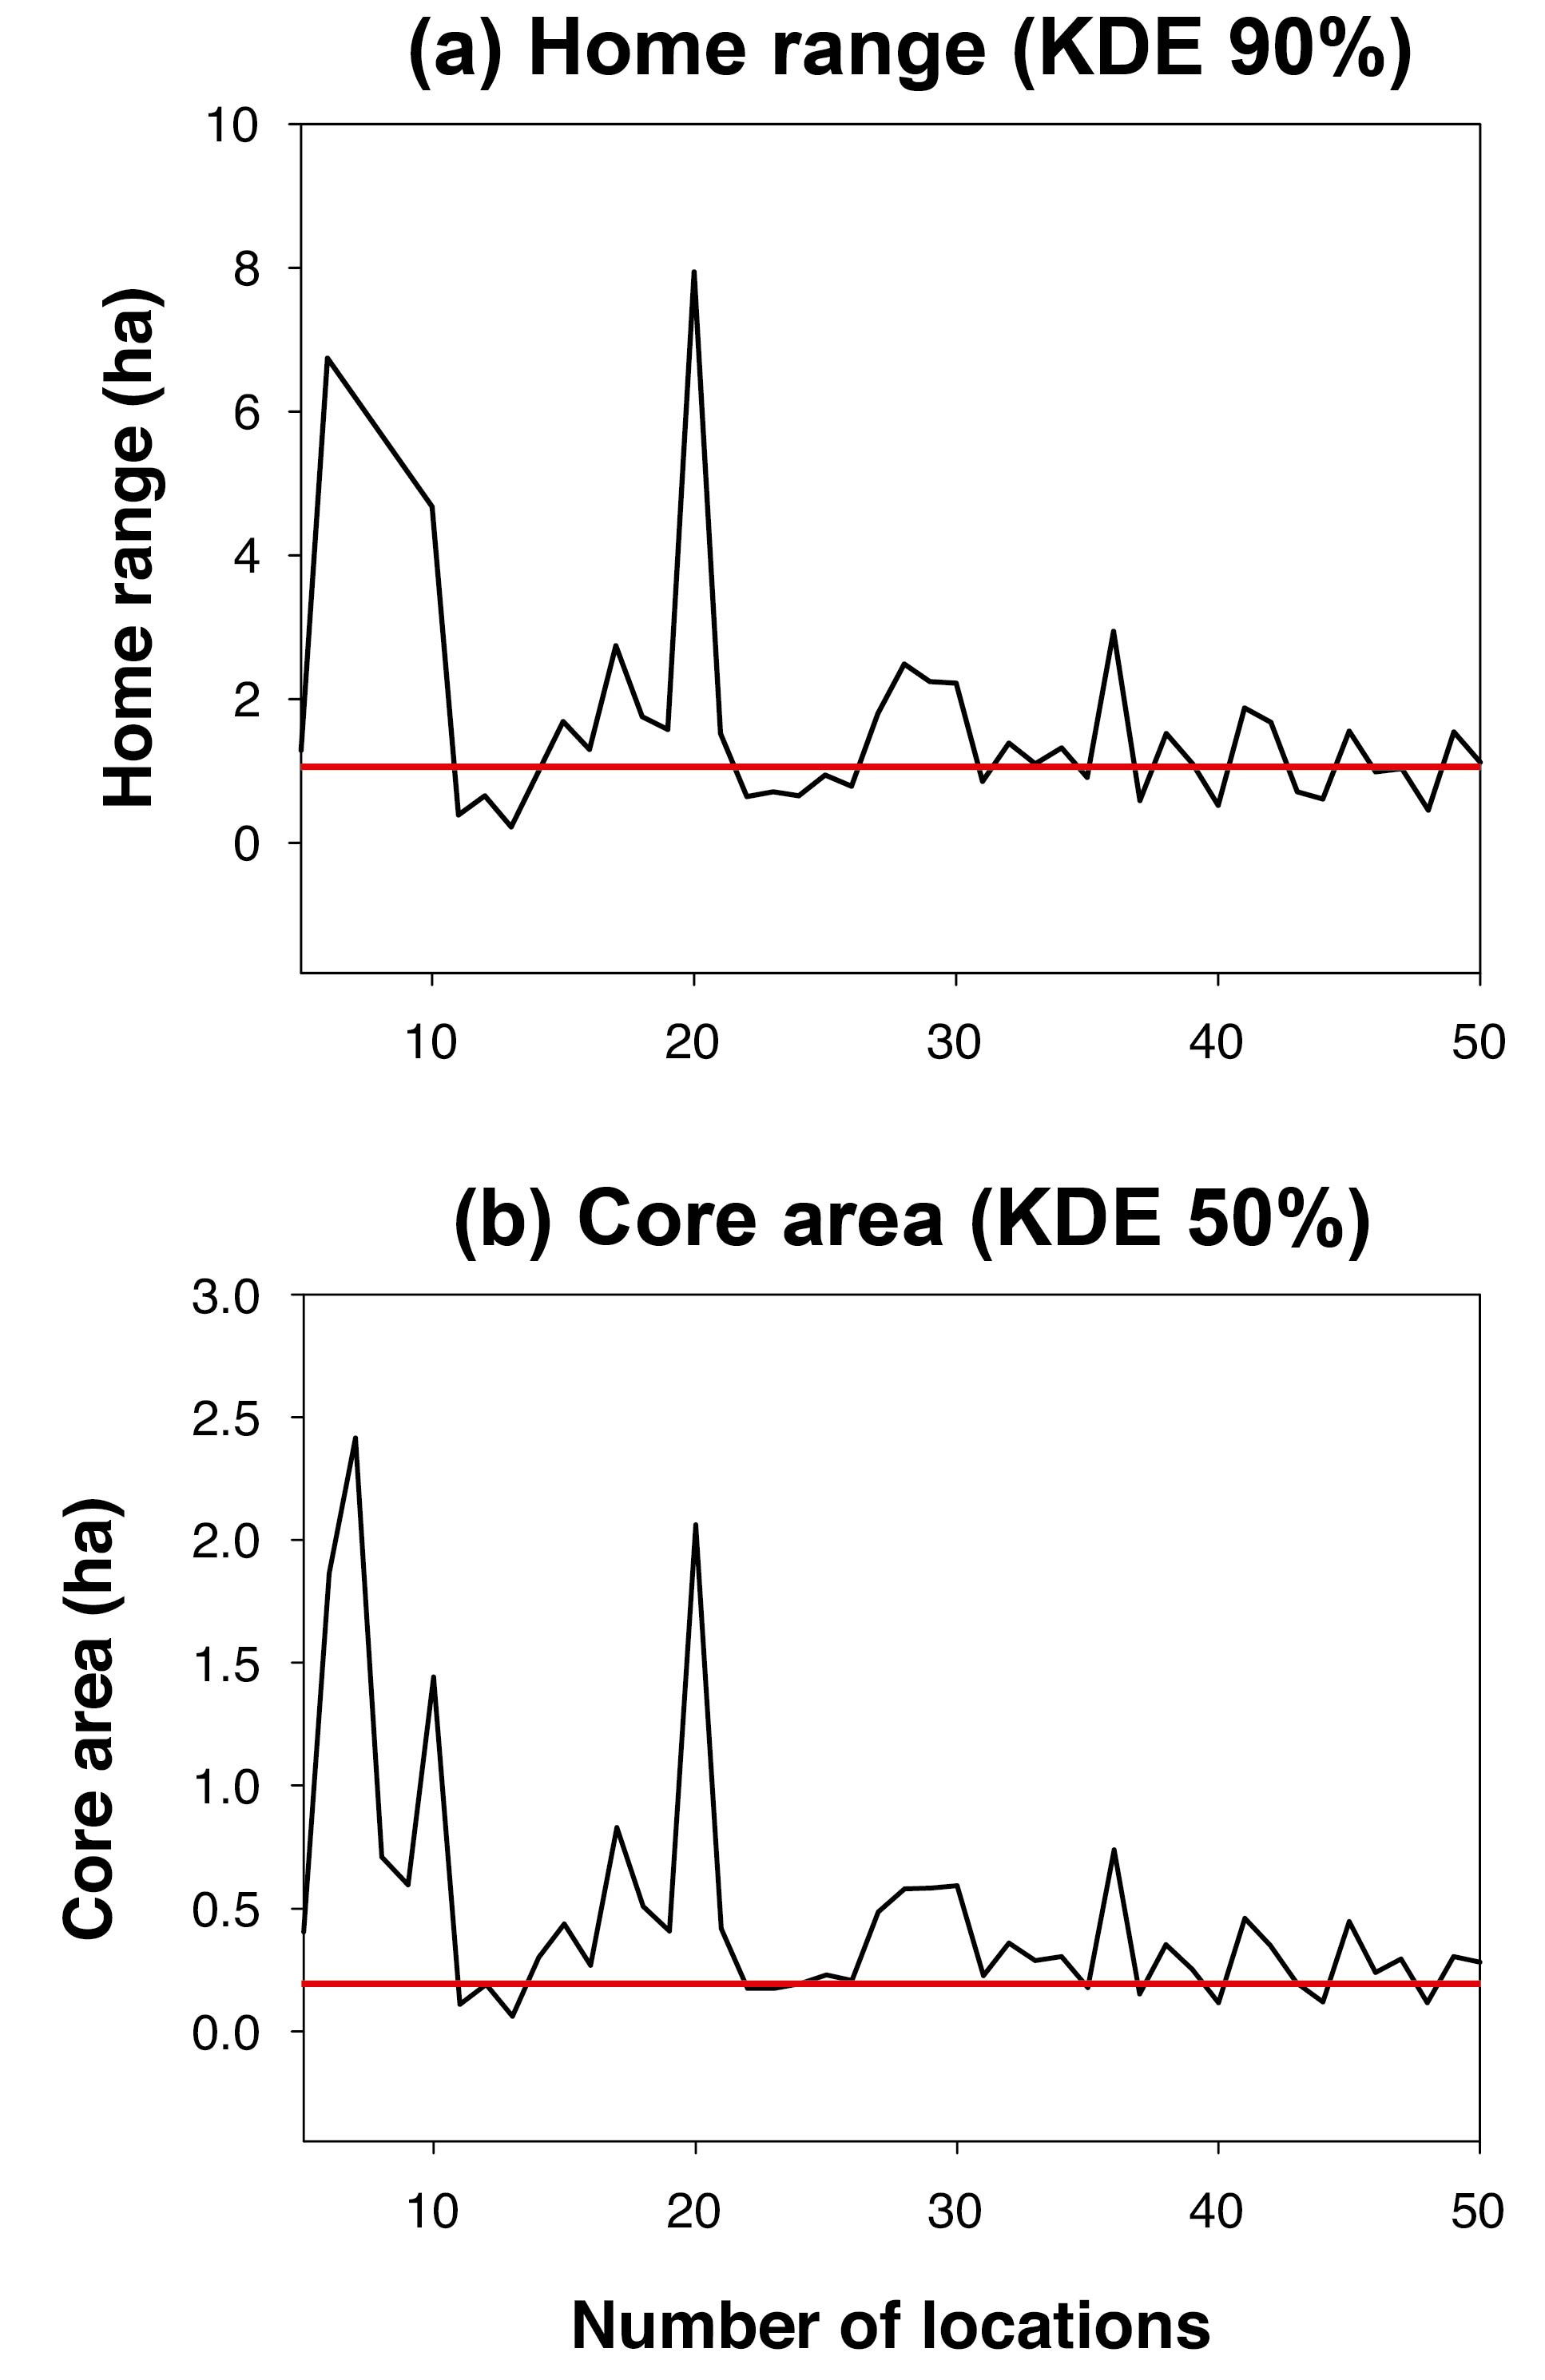
**

**Figure S1.** Accumulation curves of the number of locations (random subsets ranging from 5 to 50) and areas estimated for (a) home range, and (b) core area. Red lines represent the actual value estimated with all locations.


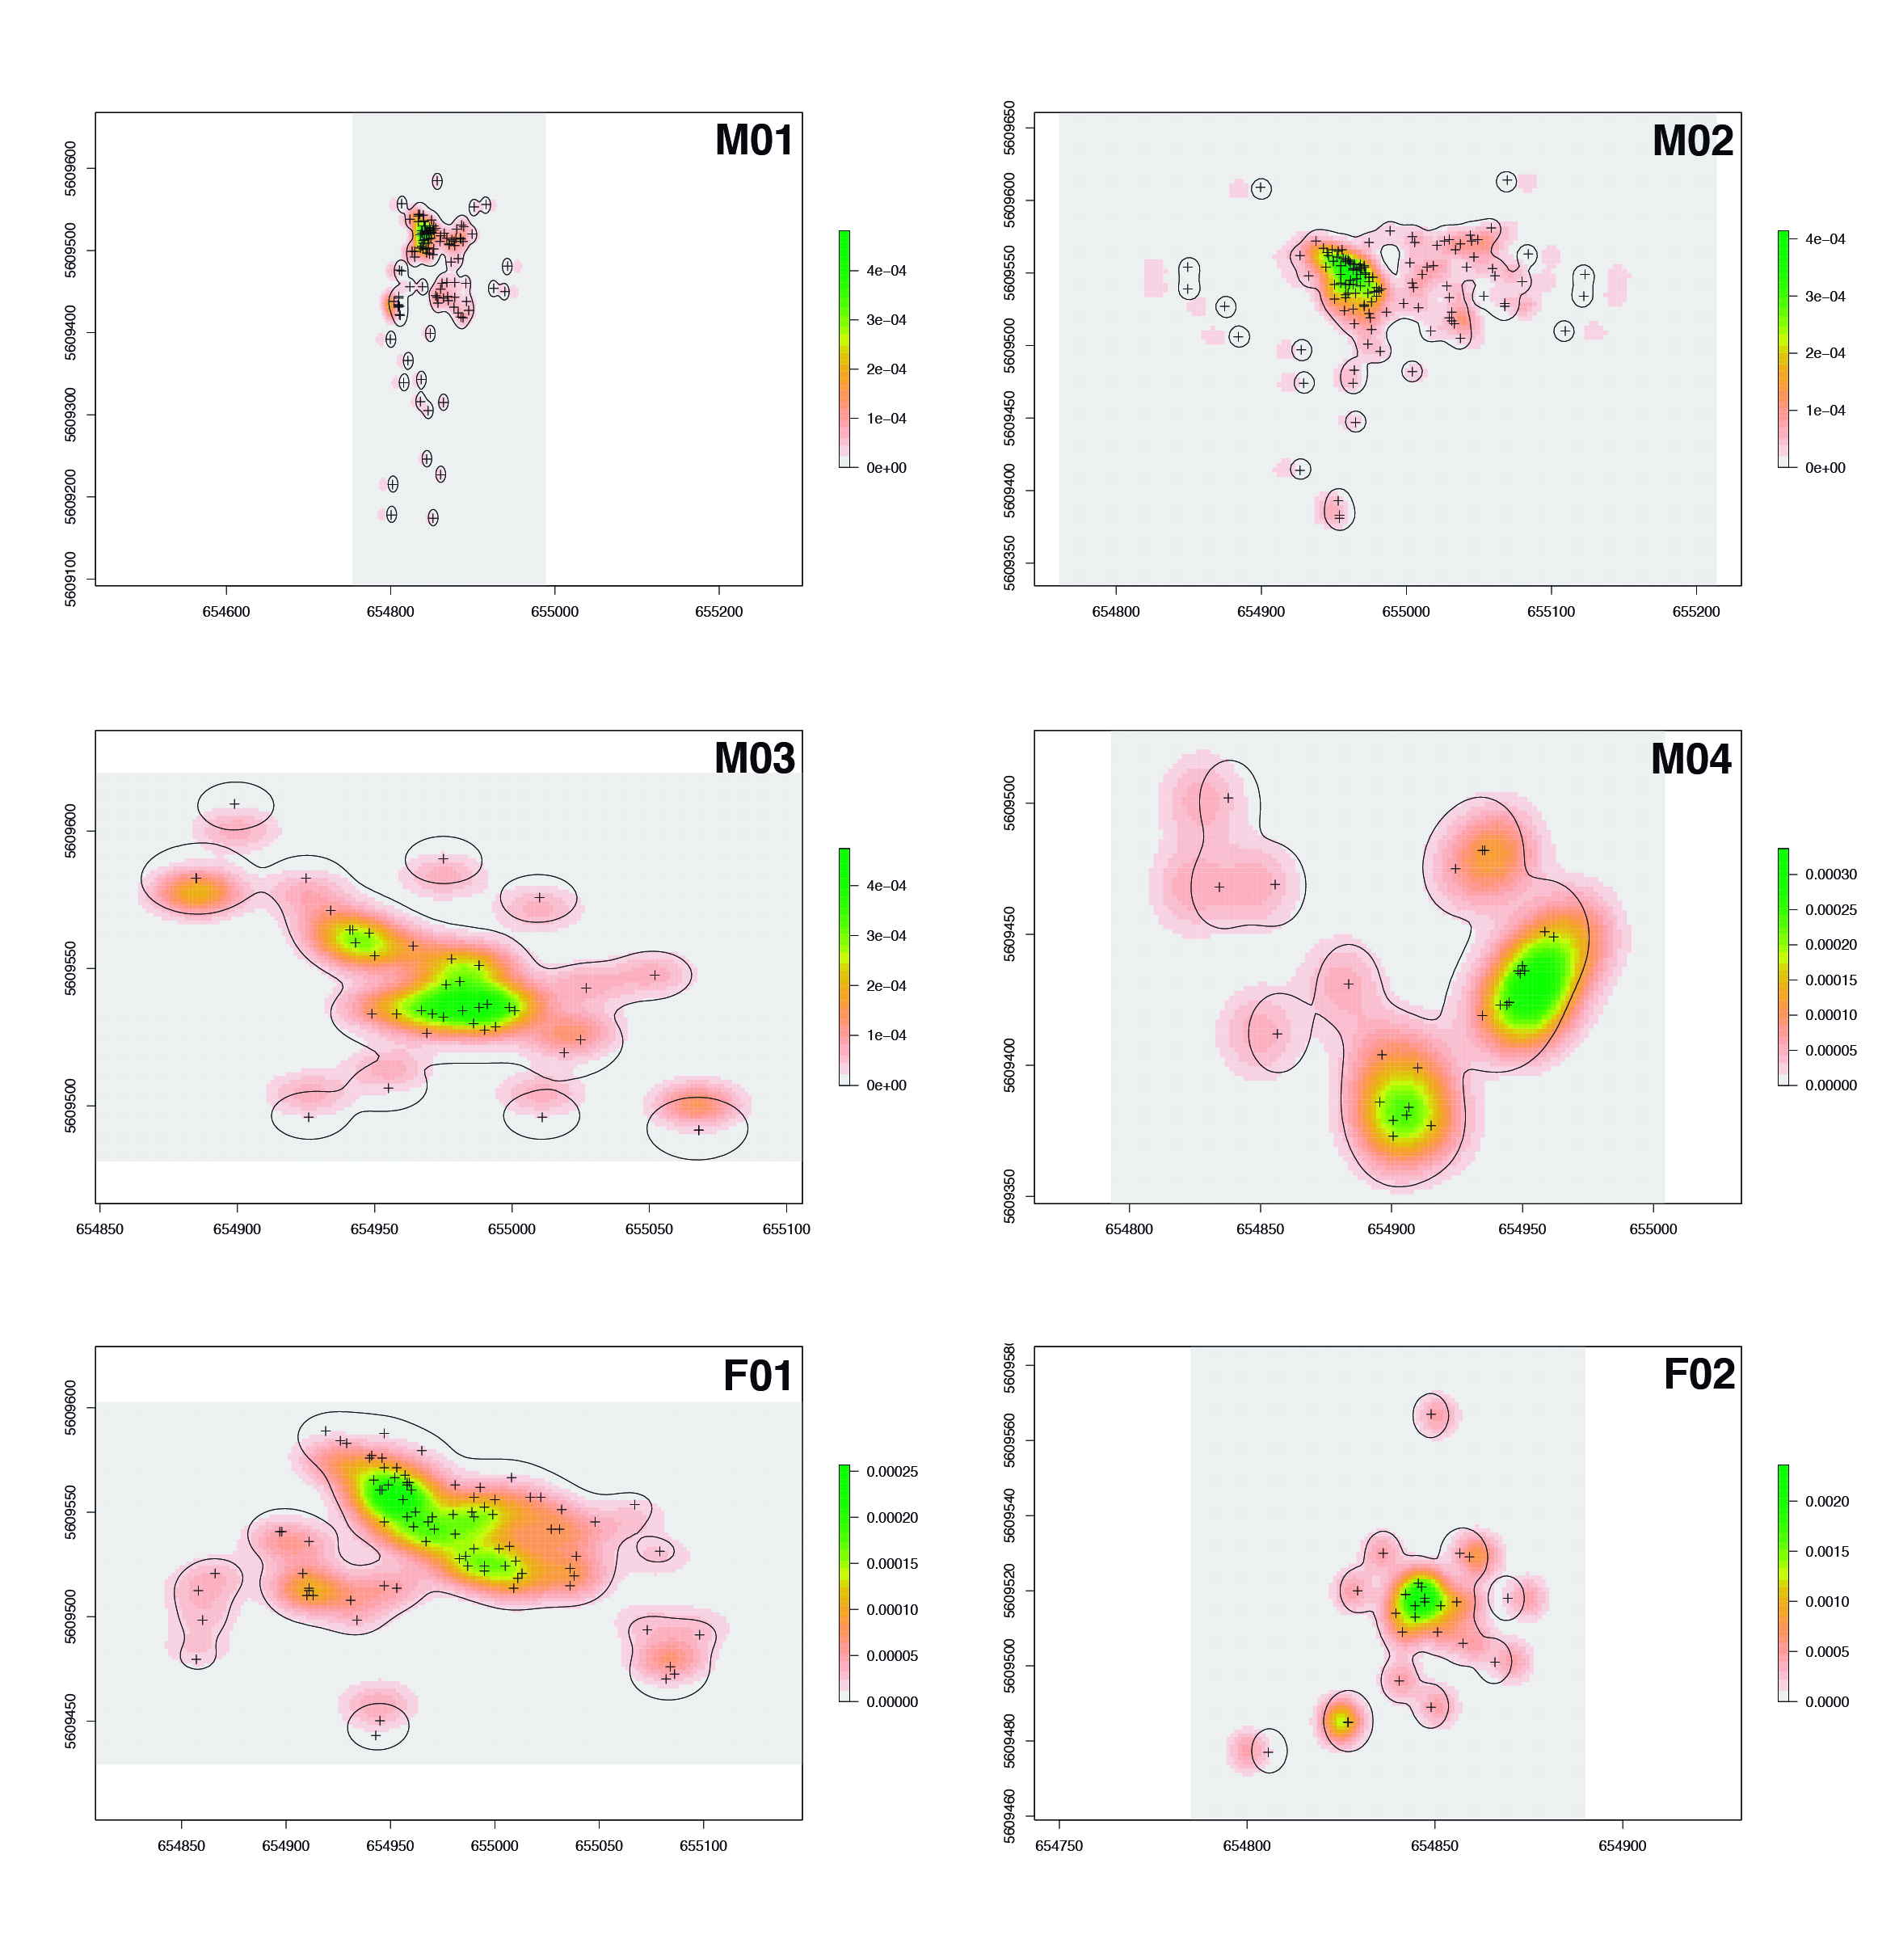


**Figure S2.** Home range (KDE 90%) areas of tracked *Dromiciops gliroides* individuals (black contours).


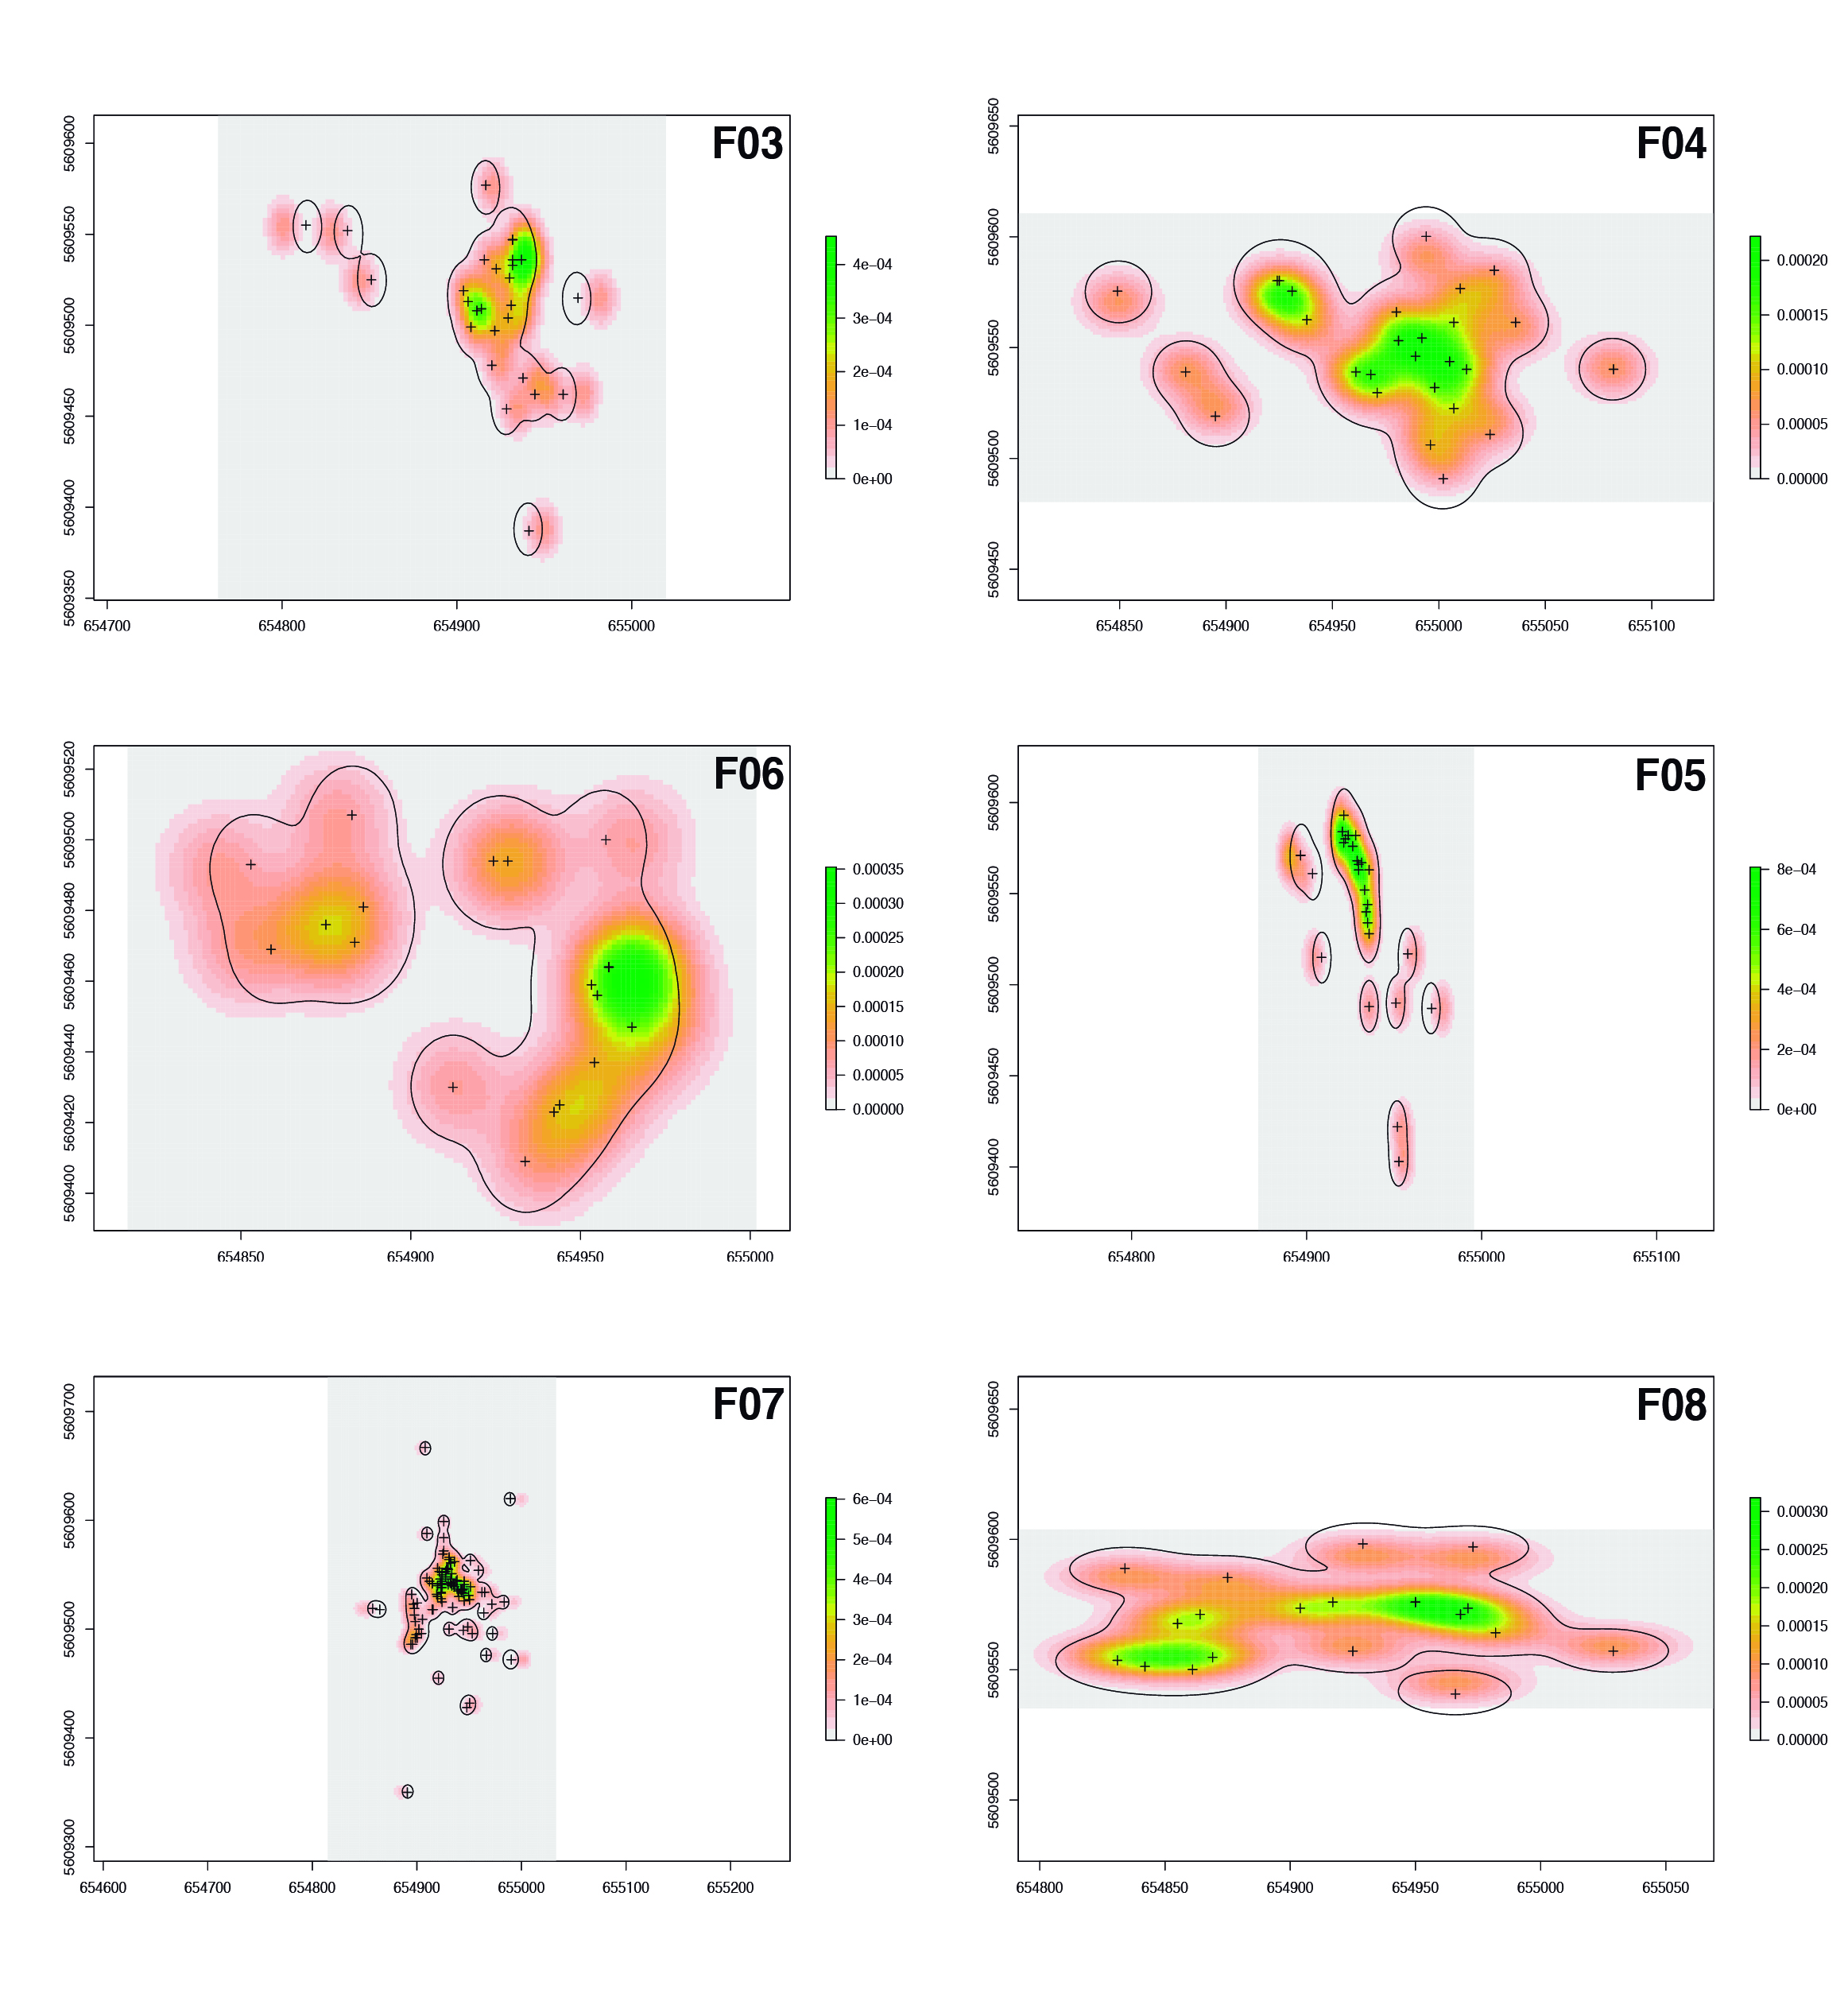


(Figure S2 continued)


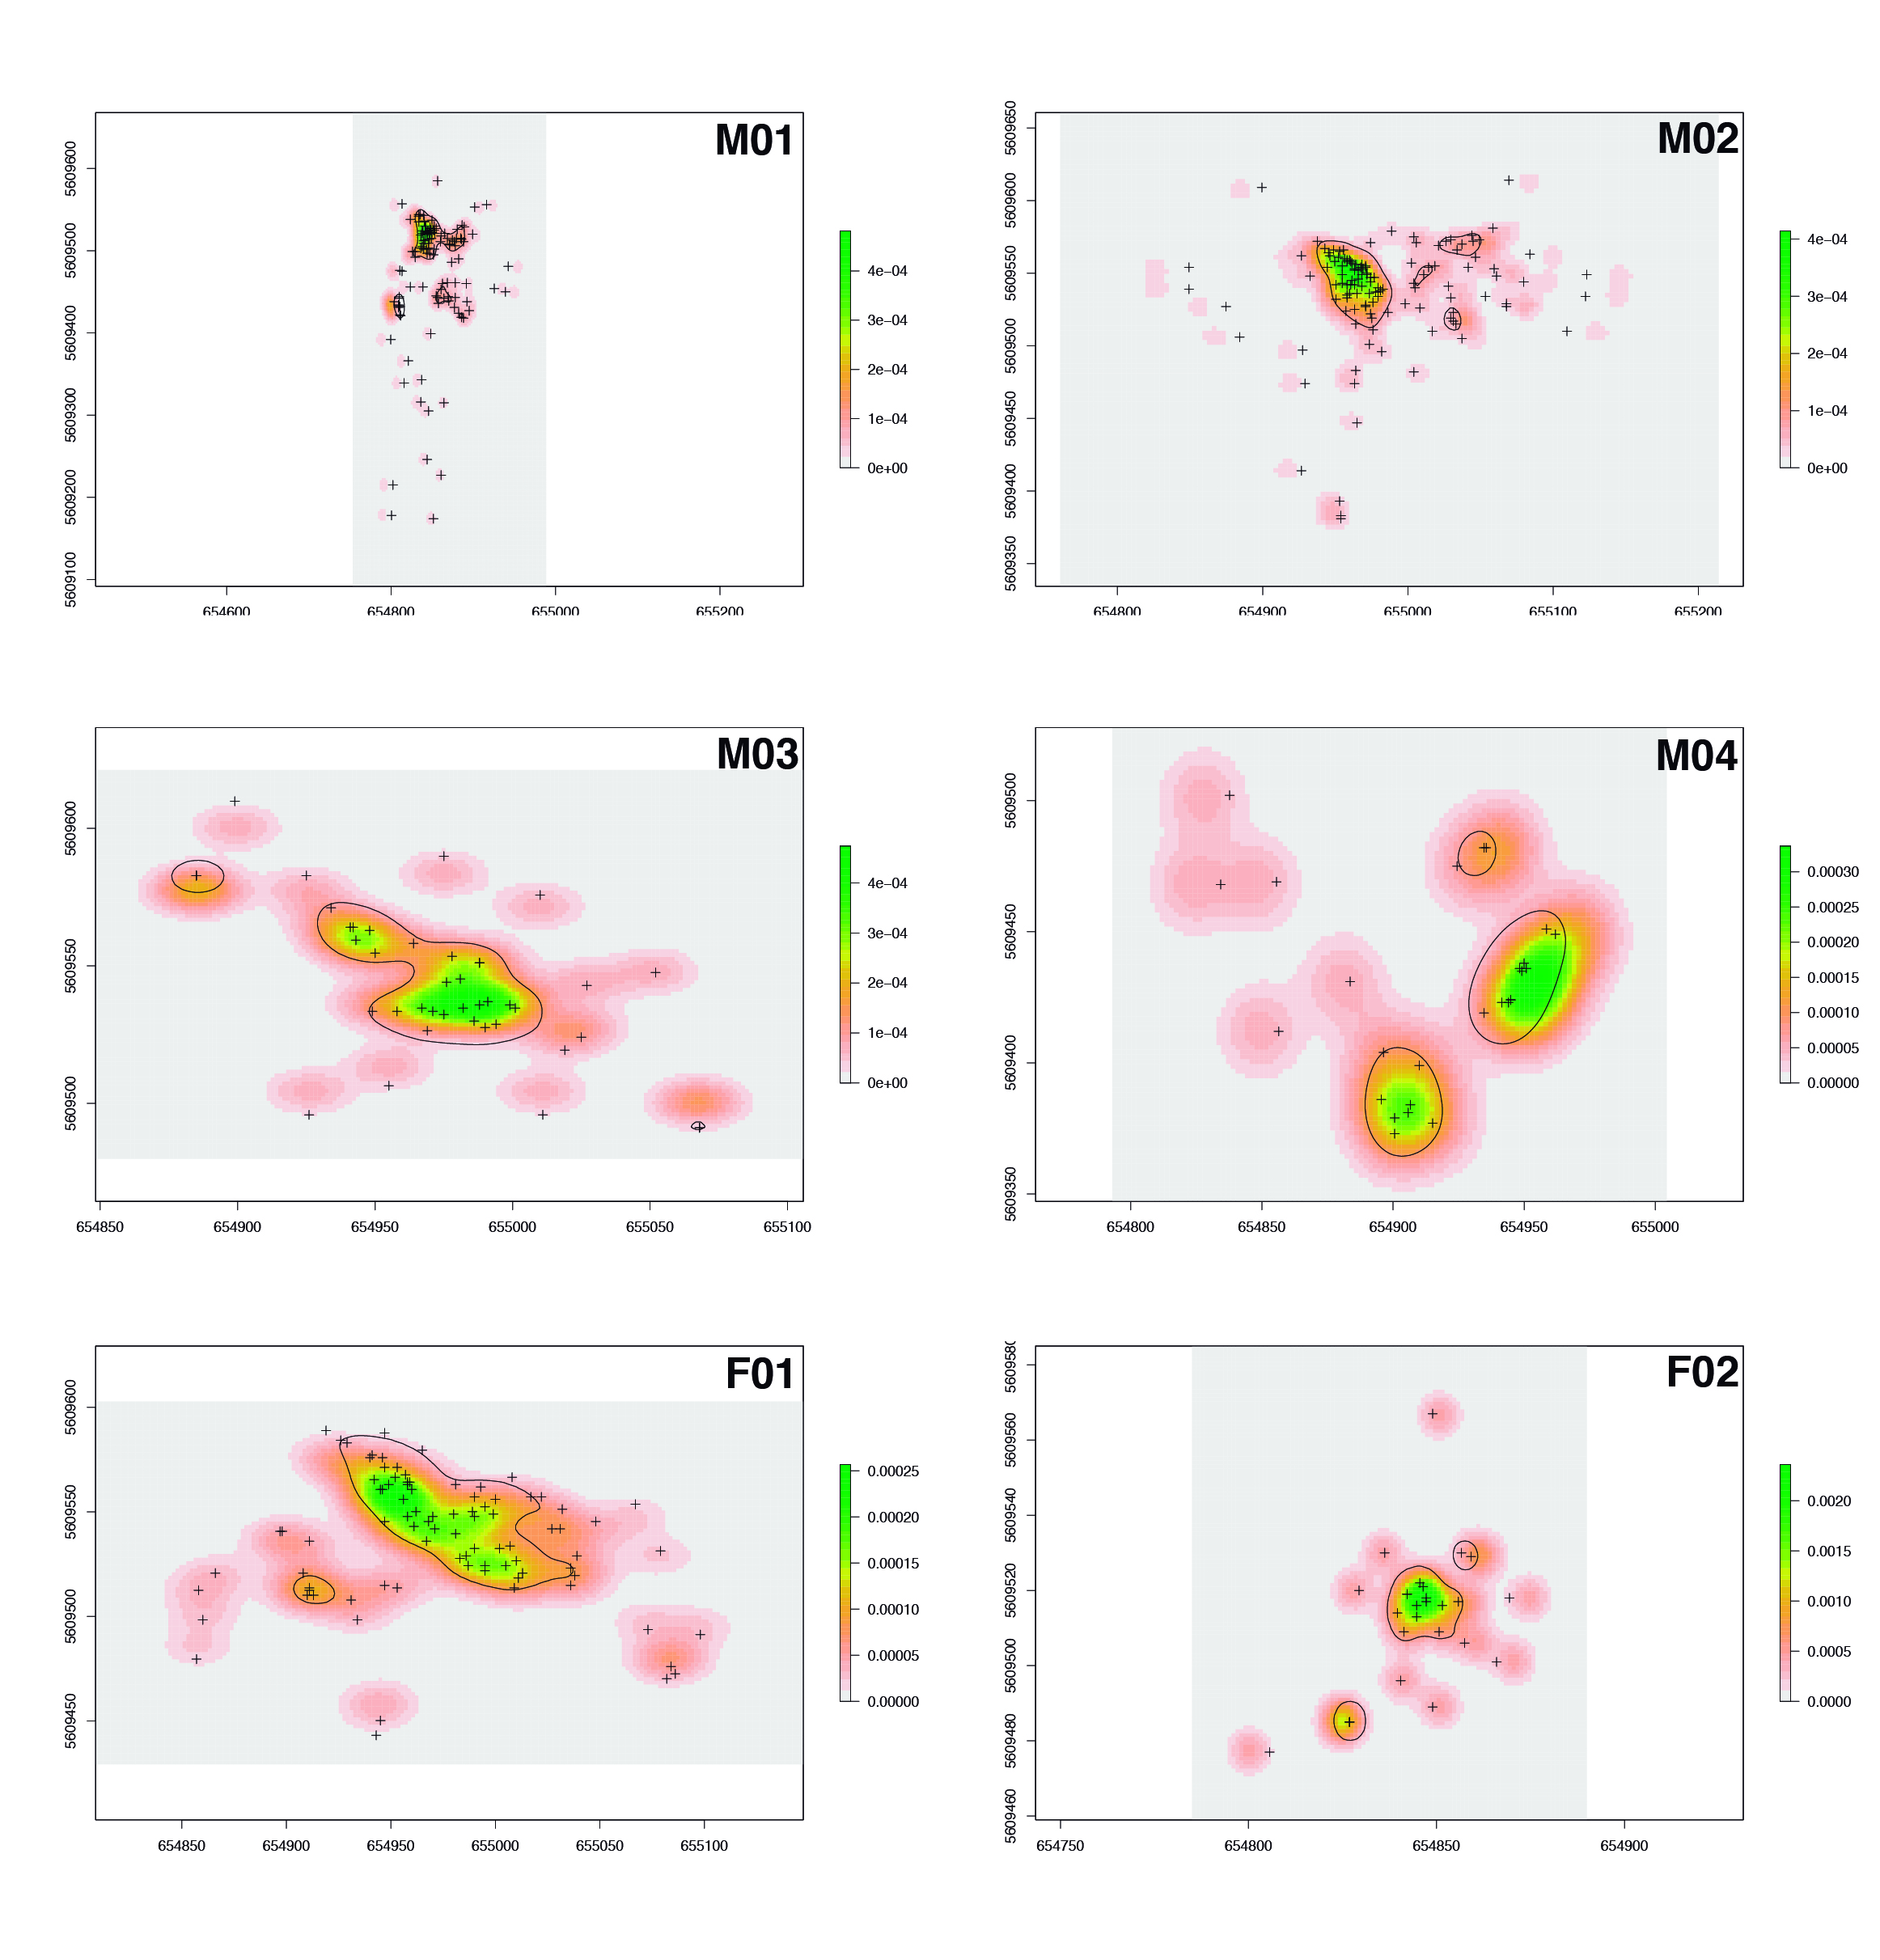


**Figure S3.** Core areas (KDE 50%) of tracked *Dromiciops gliroides* individuals (black contours).


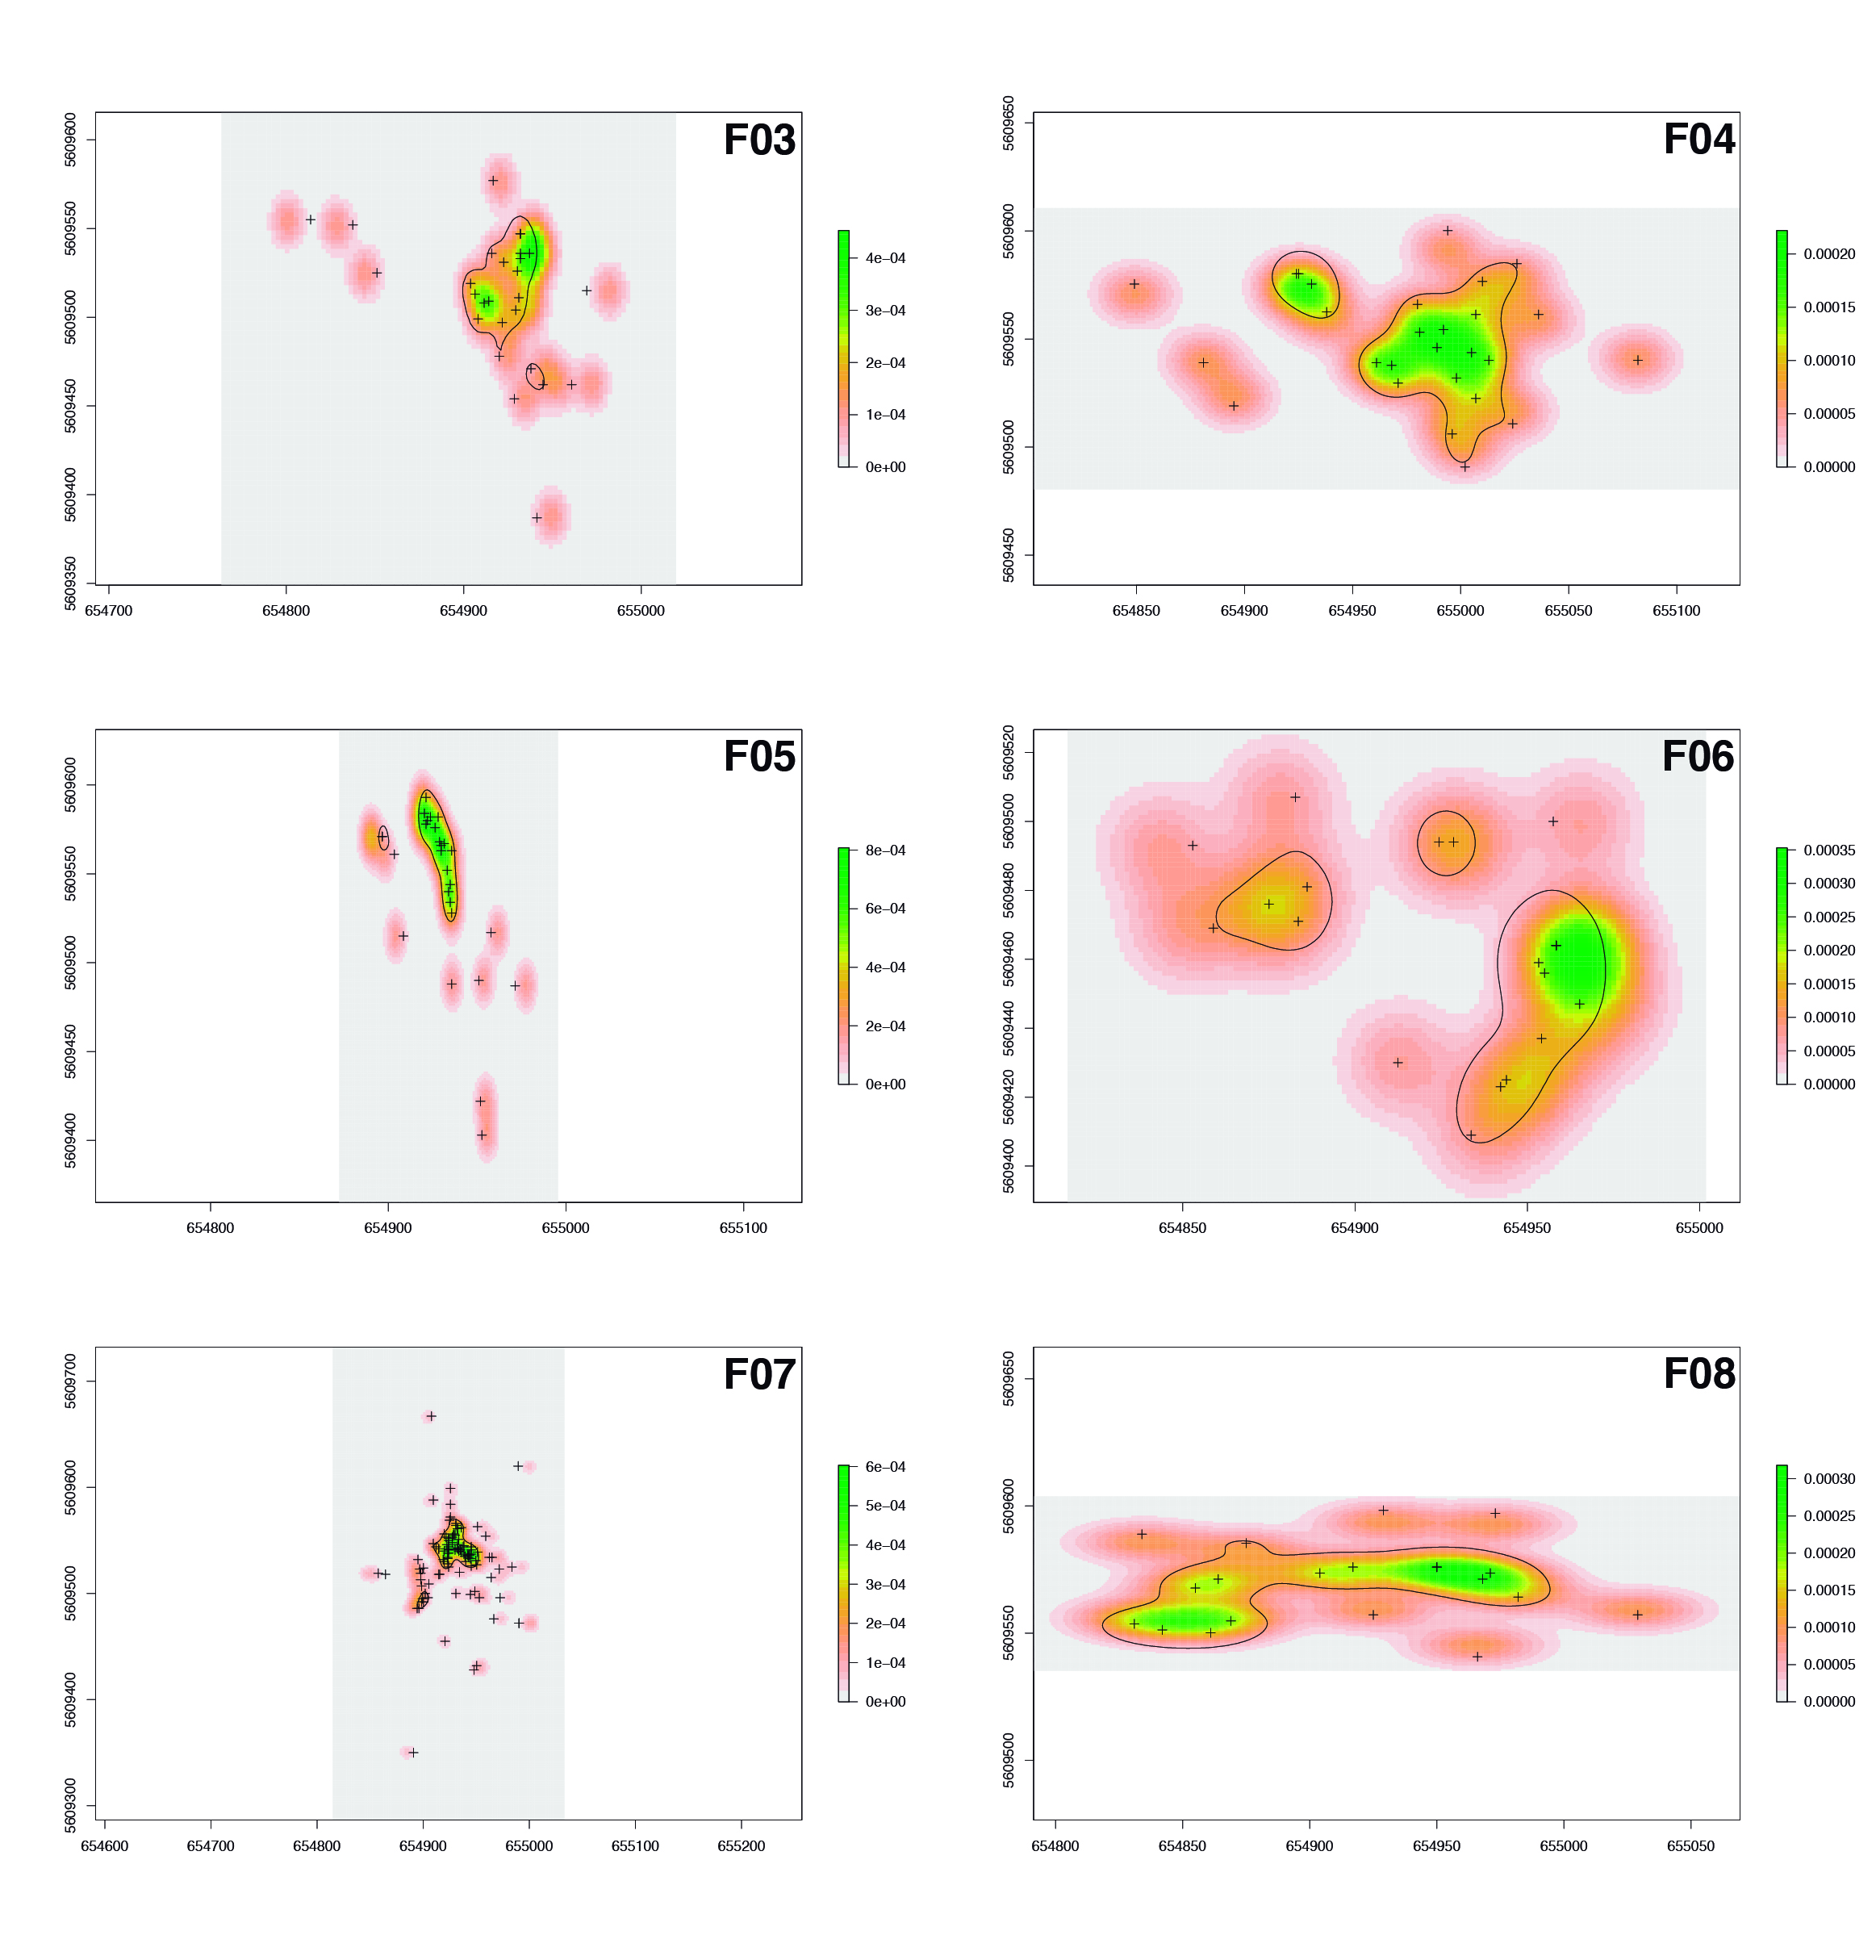


(Figure S3 continued)

**
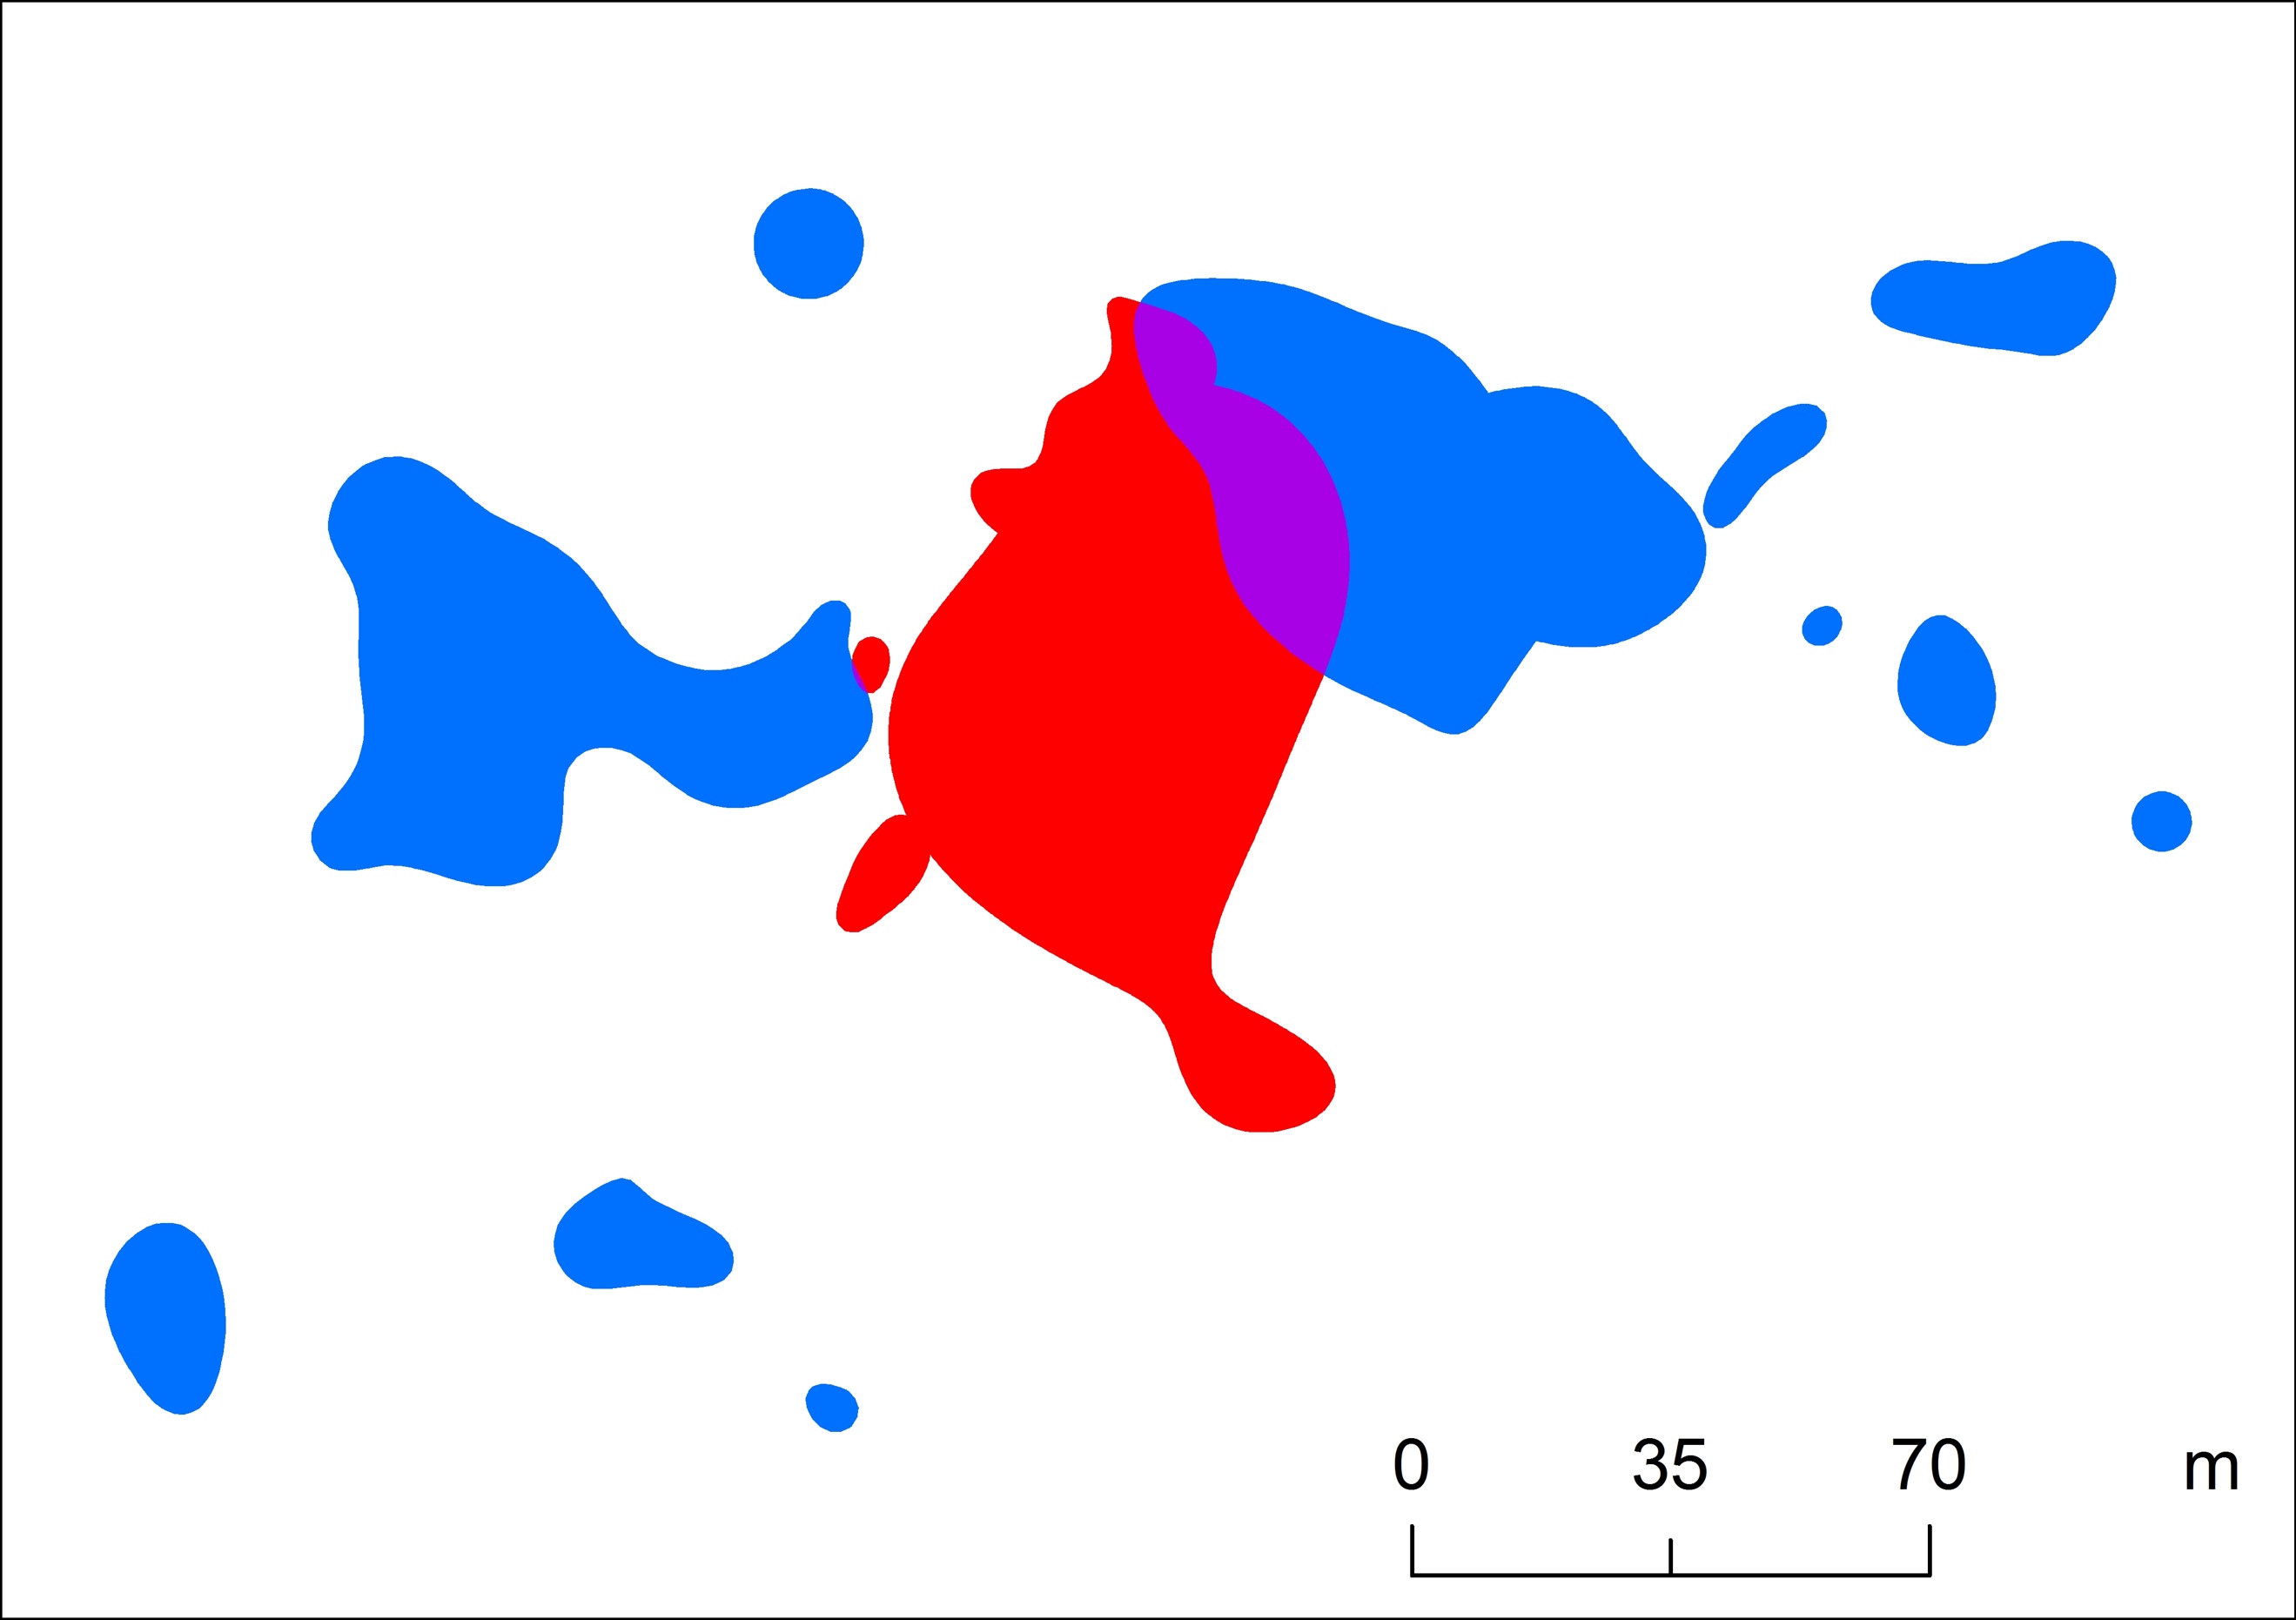
**

**Figure S4.** Core area overlap between adult males (red) and females (blue).


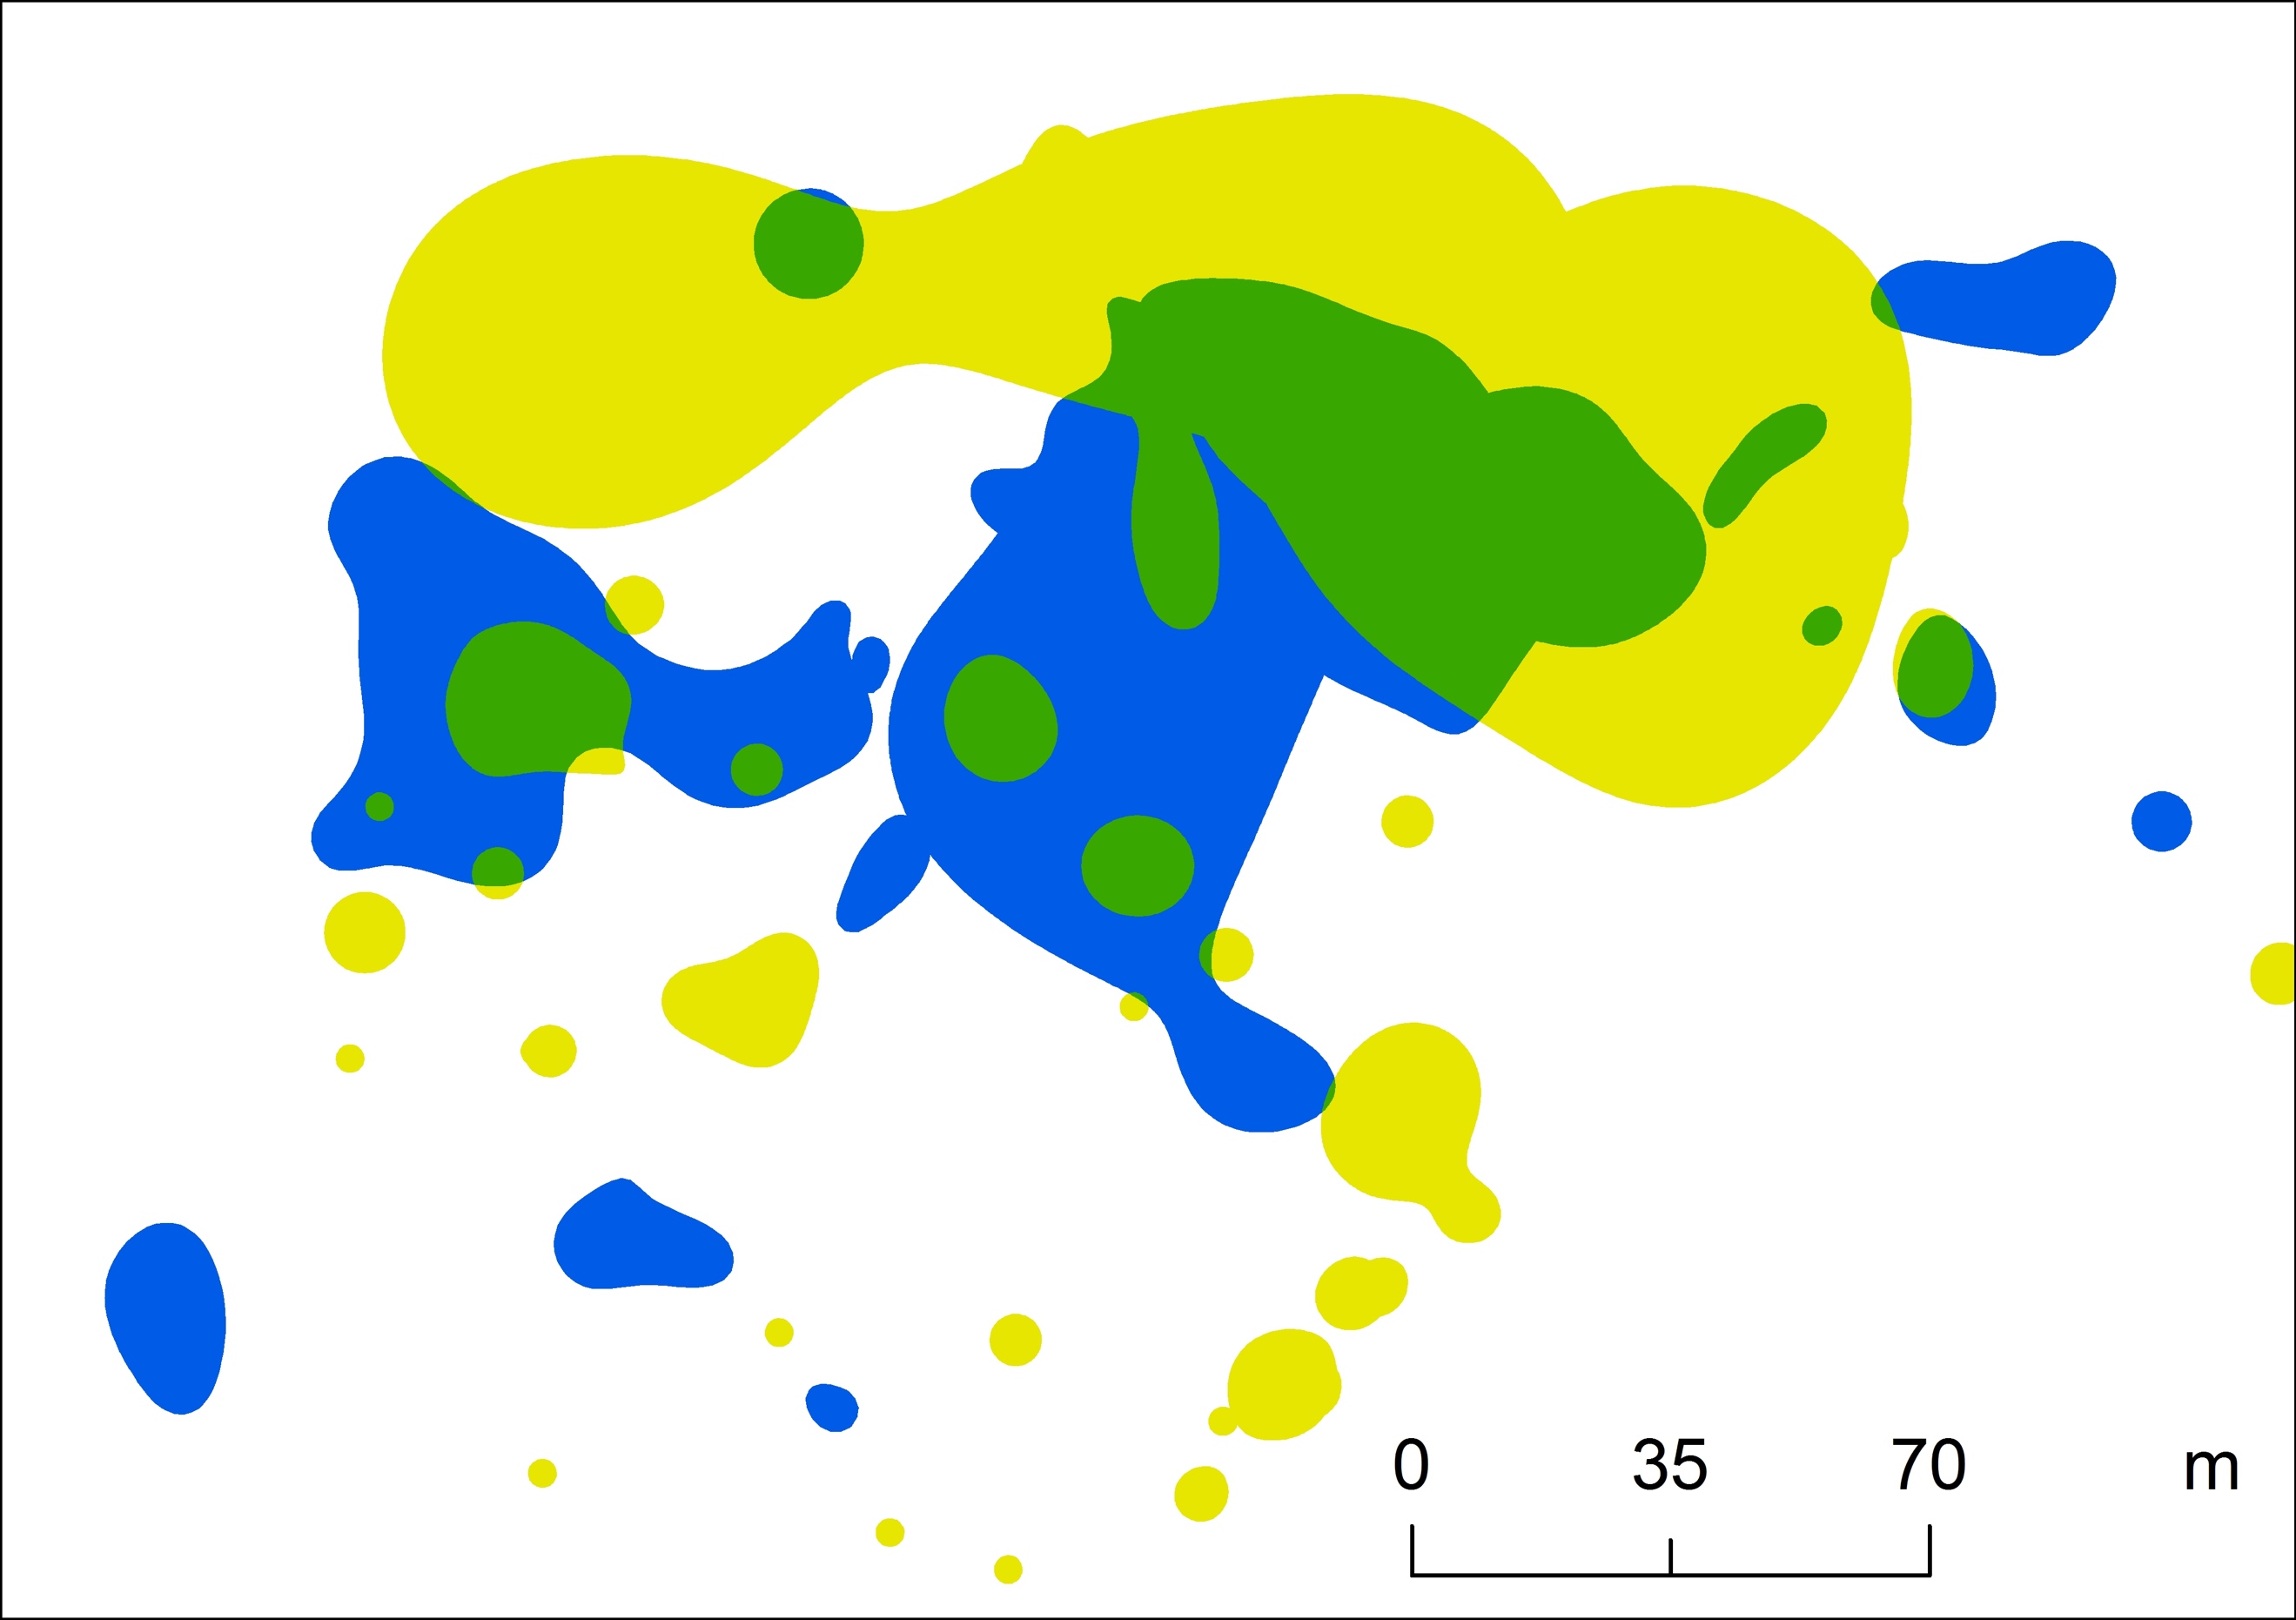


**Figure S5.** Core area overlap between adult (blue) and sub-adult (yellow) individuals (males and females combined).

**Table S1.** Detailed GLM results of body mass comparison between males and females, and between adults and sub-adults.

| **Variable** | **Estimate** | **Std error** | ***t*-value** | ***P*-value** |
| --- | --- | --- | --- | --- |
| Intercept | 35.933 | 1.474 | 24.374 | <0.001 |
| gender (male) | -5.956 | 1.679 | -3.548 | 0.006 |
| age (sub-adult) | -15.111 | 1.605 | -9.415 | <0.001 |

**Table S2.** Detailed GLM results of (a) home range and (b) core area comparisons between males and females, and between adults and sub-adults.

| **Variable** | **Estimate** | **Std error** | ***t*-value** | ***P*-value** |
| --- | --- | --- | --- | --- |
| (a) Home range comparisons | | | | |
| Intercept | 1.374 | 0.444 | 3.096 | 0.013 |
| gender (male) | -0.278 | 0.505 | -0.550 | 0.596 |
| age (sub-adult) | -0.419 | 0.483 | -0.868 | 0.408 |
| (b) Core area comparisons | | | | |
| Intercept | 0.327 | 0.130 | 2.521 | 0.033 |
| gender (male) | -0.106 | 0.148 | -0.715 | 0.493 |
| age (sub-adult) | -0.042 | 0.141 | -0.297 | 0.774 |

**Table S3.** Detailed GLM results of home range and core area vs. body mass relationships (all individuals, males and females separately, adults and sub-adults separately).

| **Variable** | **Estimate** | **Std error** | ***t*-value** | ***P*-value** |
| --- | --- | --- | --- | --- |
| (a) Home range vs. body mass (all individuals) | | | | |
| Intercept | 0.534 | 0.763 | 0.700 | 0.500 |
| bmass | 0.020 | 0.029 | 0.683 | 0.510 |
| (b) Core area vs. body mass (all individuals) | | | | |
| Intercept | 0.252 | 0.225 | 1.122 | 0.288 |
| bmass | 0.001 | 0.009 | 0.069 | 0.946 |
| (c) Home range vs. body mass (females) | | | | |
| Intercept | 0.973 | 0.974 | 0.999 | 0.356 |
| bmass | 0.004 | 0.038 | 0.092 | 0.929 |
| (d) Home range vs. body mass (males) | | | | |
| Intercept | -1.382 | 0.965 | -1.432 | 0.288 |
| bmass | 0.091 | 0.036 | 2.509 | 0.129 |
| (e) Core area vs. body mass (females) | | | | |
| Intercept | 0.364 | 0.297 | 1.225 | 0.267 |
| bmass | -0.003 | 0.012 | -0.240 | 0.819 |
| (f) Core area vs. body mass (males) | | | | |
| Intercept | -0.246 | 0.154 | -1.600 | 0.251 |
| bmass | 0.017 | 0.006 | 3.031 | 0.094 |
| (g) Home range vs. body mass (adults) | | | | |
| Intercept | 0.928 | 1.538 | 0.604 | 0.589 |
| bmass | 0.009 | 0.047 | 0.183 | 0.866 |
| (h) Home range vs. body mass (sub-adults) | | | | |
| Intercept | 1.114 | 5.699 | 0.195 | 0.853 |
| bmass | -0.010 | 0.285 | -0.035 | 0.973 |
| (i) Core area vs. body mass (adults) | | | | |
| Intercept | 0.928 | 1.538 | 0.604 | 0.589 |
| bmass | 0.009 | 0.047 | 0.183 | 0.866 |
| (j) Core area vs. body mass (sub-adults) | | | | |
| Intercept | 1.114 | 5.699 | 0.195 | 0.853 |
| bmass | -0.010 | 0.285 | -0.035 | 0.973 |

**Table S4.** Detailed GLM results of home range and core area vs. number of locations relationships (all individuals, females and males separately).

| **Variable** | **Estimate** | **Std error** | ***t*-value** | ***P*-value** |
| --- | --- | --- | --- | --- |
| (a) Home range vs. number of locations (all individuals) | | | | |
| Intercept | 0.887 | 0.347 | 2.556 | 0.029 |
| locations | 0.003 | 0.005 | 0.534 | 0.605 |
| (b) Core area vs. number of locations (all individuals) | | | | |
| Intercept | 0.282 | 0.101 | 2.784 | 0.019 |
| locations | 0.000 | 0.002 | -0.178 | 0.862 |
| (c) Home range vs. number of locations (females) | | | | |
| Intercept | 1.246 | 0.476 | 2.621 | 0.040 |
| locations | -0.004 | 0.009 | -0.487 | 0.644 |
| (d) Home range vs. number of locations (males) | | | | |
| Intercept | 0.060 | 0.246 | 0.245 | 0.829 |
| locations | 0.012 | 0.003 | 4.340 | 0.049 |
| (e) Core area vs. number of locations (females) | | | | |
| Intercept | 0.368 | 0.144 | 2.558 | 0.043 |
| locations | -0.002 | 0.003 | -0.622 | 0.557 |
| (f) Core area vs. number of locations (males) | | | | |
| Intercept | 0.049 | 0.066 | 0.741 | 0.536 |
| locations | 0.002 | 0.001 | 2.837 | 0.105 |

**Table S5.** Detailed GLMM results of movement speed comparison among activity periods (G1 = early activity period, G2 = peal activity period, G3 = late activity period). Random factor (tracked individual) variance = 0.045.

| **Variable** | **Estimate** | **Std error** | **df** | ***t*-value** | ***P*-value** |
| --- | --- | --- | --- | --- | --- |
| Intercept | 0.840 | 0.092 | 19.576 | 9.141 | 0.000 |
| group (G2) | -0.245 | 0.074 | 446.840 | -3.319 | 0.001 |
| group (G3) | -0.212 | 0.070 | 448.176 | -3.034 | 0.003 |
